# Supplementary material for: Association between family history and lung cancer risk among Chinese women in Singapore
Source: PubMed Central journal article supplement (PMC8575905; doi:10.1038/s41598-021-00929-9), 2021-11-08
Supplement: 41598_2021_929_MOESM1_ESM.pdf [file 41598_2021_929_MOESM1_ESM.pdf]

## Supplementary Information

**Supplementary Table 1. Histological subtypes of lung cancer**

| Histologic type            | ICD-O-3 codes                                                                                                                                                                                                                                                                                                                                                                                                     |
|----------------------------|-------------------------------------------------------------------------------------------------------------------------------------------------------------------------------------------------------------------------------------------------------------------------------------------------------------------------------------------------------------------------------------------------------------------|
| Non-small cell lung cancer | <ul style="list-style-type: none"><li>• 8070/3 (Squamous cell carcinoma, NOS)</li><li>• 8012/3 (Large cell carcinoma, NOS)</li><li>• 8046/3 (Non-small cell carcinoma)</li><li>• 8140/3 (Adenocarcinoma, NOS)</li><li>• 8260/3 (Papillary adenocarcinoma, NOS)</li><li>• 8480/3 (Mucinous adenocarcinoma)</li><li>• 8250/3 (Lepidic adenocarcinoma)</li><li>• 8253/3 (Adenocarcinoma of lung, mucinous)</li></ul> |
| Adenocarcinoma             | <ul style="list-style-type: none"><li>• 8140/3 (Adenocarcinoma, NOS)</li><li>• 8260/3 (Papillary adenocarcinoma, NOS)</li><li>• 8480/3 (Mucinous adenocarcinoma)</li><li>• 8250/3 (Lepidic adenocarcinoma)</li><li>• 8253/3 (Adenocarcinoma of lung, mucinous)</li></ul>                                                                                                                                          |
| Squamous cell carcinoma    | <ul style="list-style-type: none"><li>• 8070/3 (Squamous cell carcinoma, NOS)</li></ul>                                                                                                                                                                                                                                                                                                                           |
| Large cell carcinoma       | <ul style="list-style-type: none"><li>• 8012/3 (Large cell carcinoma, NOS)</li></ul>                                                                                                                                                                                                                                                                                                                              |
| Unspecified NSCLC          | <ul style="list-style-type: none"><li>• 8046/3 (Non-small cell carcinoma)</li></ul>                                                                                                                                                                                                                                                                                                                               |
| Small cell lung cancer     | <ul style="list-style-type: none"><li>• 8041/3 (Small cell carcinoma, NOS)</li></ul>                                                                                                                                                                                                                                                                                                                              |
| Neuroendocrine carcinoma   | <ul style="list-style-type: none"><li>• 8013/3 (Large cell neuroendocrine carcinoma)</li><li>• 8240/3 (Neuroendocrine tumour, NOS)</li><li>• 8246/3 (Neuroendocrine carcinoma, NOS)</li></ul>                                                                                                                                                                                                                     |

**Supplementary Table 2. Distribution of histologic type of lung cancer among cases and controls with and without family history of lung cancer**

|                                                                     | <b>All women</b>         |                             |
|---------------------------------------------------------------------|--------------------------|-----------------------------|
| <b>Family history (FH) of lung cancer in first-degree relatives</b> | <b>Cases<br/>(n (%))</b> | <b>Controls<br/>(n (%))</b> |
| <b>Non-adenocarcinoma non-small cell lung cancer</b>                | (n=54)                   | (n=650)                     |
| FH absent                                                           | 47 (87.0%)               | 608 (93.5%)                 |
| FH present                                                          | 7 (13.0%)                | 42 (6.5%)                   |
| <b>Small cell lung cancer</b>                                       | (n=17)                   | (n=650)                     |
| FH absent                                                           | 14 (82.4%)               | 608 (93.5%)                 |
| FH present                                                          | 3 (17.6%)                | 42 (6.5%)                   |
| <b>Neuroendocrine carcinoma</b>                                     | (n=4)                    | (n=650)                     |
| FH absent                                                           | 2 (50.0%)                | 608 (93.5%)                 |
| FH present                                                          | 2 (50.0%)                | 42 (6.5%)                   |

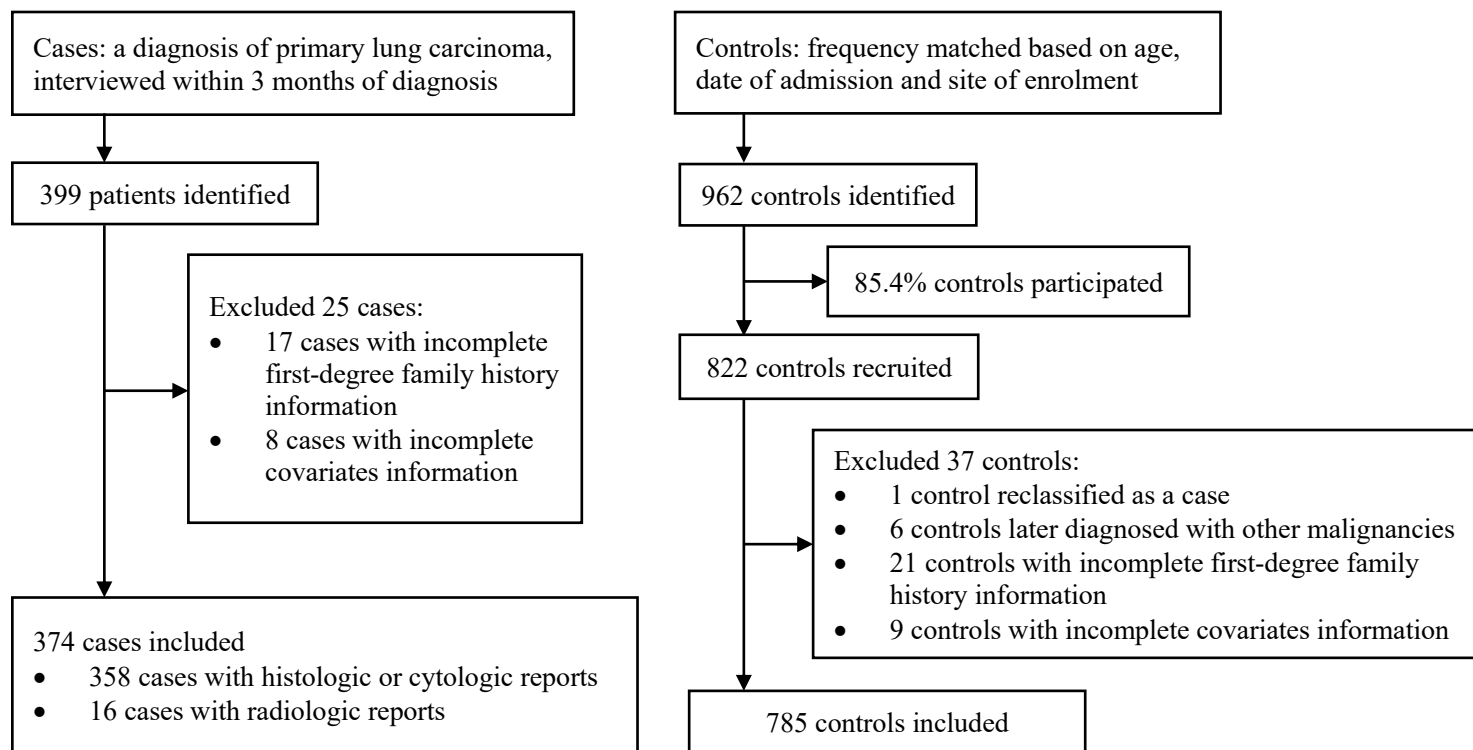

**Supplementary Figure 1. Flowchart of study inclusion and exclusion criteria**
